# Supplementary material for: Metabolic profiling of a myalgic encephalomyelitis/chronic fatigue syndrome discovery cohort reveals disturbances in fatty acid and lipid metabolism
Source: Royal Society of Chemistry journal article supplement (doi:10.1039/c6mb00600k), 2016-12-23
Supplement: c6mb00600k2.xlsx [file c6mb00600k2.xlsx]

## Sheet: Data_for_R_2.csv
		1	2	3	4	5	6	7	8	9	10	11	12	13	14	15	16	17	18	19	20	21	22	23	24	25	26	27	28	29	30	31	32	33	34	35	36	37	38	39	40	41	42	43	44	45	46	47	48
Patient_ID		lithocholate	[(2R-3S-4R-5R)-5-(2-4-dioxo-1-2-3-4-tetrahydropyrimidin-1-yl)-3-4-dihydroxyoxolan-2-yl]methyl {[(3R-4S-5S-6R)-3-4-5-trihydroxy-6-(hydroxymethyl)oxan-2-yl phosphonato]oxy}phosphonate/UDP-D-galactose	glycolithocholate	25-hydroxyvitamin D3-26-23-lactone	13-carboxy-alpha-tocopherol	CDPcholine	S-(2-Methylpropanoyl)-dihydrolipoamide	2-3-epoxy-alpha-tocopheryl quinone/5-6-epoxy-alpha-tocopheryl quinone	acetylcarnosine	succinyl carnitine	C20H32O4(21)	5-guanidino-2-oxopentanoic acid	sulfoglycolithocholate(2-)	C20H34O4(4)	4-Imidazolone-5-propanoate	glycocholate	ATP	choline phosphate(1-)	ADP	glyoxylate	glycochenodeoxycholate	2-methylglutaconic acid	D-gluconate	L-gulonate	L-erythrulose	C3H4O2(3)	C4H6O3(3)	Taurine	D-glucose	L-proline	acetamidopropanal	C20H30O2(4)	11-cis-eicosenoate	3-(methylthio)propionate	cervonic acid C22:6 n-3/docosahexaenoate	Oxaloacetate	D-Glucuronate 1-phosphate	Biotin	(S)-3-sulfonatolactate(2-)	trans-caffeate/3-(4-hydroxyphenyl)pyruvate	UTP(4-)	5-Amino-1-(5-Phospho-D-ribosyl)imidazole-4-carboxamide	o-methylhippurate	fructoseglycine	S-[2-carboxy-1-(1 H-imidazol-4-yl)ethyl]-L-cysteine	3alpha-7alpha-12alpha-25-tetrahydroxy-5beta-cholestane-24-one/3alpha-7alpha-12alpha-Trihydroxy-5beta-cholestanoate	3-oxo-8(R)-hydroxy-hexadeca-6E10Z-dienoate/3-oxo-8(S)-hydroxy-hexadeca-6E10Z-dienoate	2-keto-3-deoxy-D-glycero-D-galactononic acid
1	Control	1000	10687	1000	14625.4	35803.4	9926.03	13119.4	58541	24854.8	39605.9	64510.2	41409.7	1584.03	112022	97443.8	35544.2	151901	170670	202735	285901	417038	537557	1.07424e+06	1.07424e+06	812929	788039	1.36277e+06	1.17267e+07	9.14999e+06	2.50812e+07	2.50812e+07	352044	621767	439598	1.62725e+06	3920.78	5694.3	12927.8	19967.7	26927.4	18223.2	19868.4	15996.3	37529.2	31456.2	44067.2	100795	37441.5
2	Control	1457.87	9343.21	10760.3	16215.8	18959.8	19708.5	21225.9	23326	23408.8	21829.5	44509.1	101687	95410.9	114277	110346	115540	265722	175400	323613	330679	1.12025e+06	1.09859e+06	1.6604e+06	1.6604e+06	1.52487e+06	1.52204e+06	2.0019e+06	1.26172e+07	1.34278e+07	4.52045e+07	4.52045e+07	218964	268997	426386	977139	2564.55	3087.54	11501.9	17213	22209	18114.1	23407.2	26852.9	23855.3	20512.7	17908.2	43693.1	36508.7
3	Control	1000	12897.4	1405.17	14567.6	21267.9	32116.7	35267.3	24547.3	34509.1	56518.9	55136.5	195829	92227.8	124257	183766	59892.5	286987	221614	346807	354212	359581	1.32304e+06	1.73951e+06	1.73951e+06	1.80386e+06	1.85546e+06	2.67819e+06	1.28623e+07	1.14803e+07	3.64405e+07	3.64405e+07	213494	543701	375012	1.41537e+06	7515.03	5311.41	14409.6	89627.6	14516.9	18975.8	32068.4	14983.3	9844.56	26259.4	33016.5	22660.9	74602.8
4	Control	7347.29	5981.02	1000	17926.7	32565.7	27493.1	16302.6	60667.9	24132.1	31539	85760.9	37741.1	16059.7	140025	106378	209599	254852	251806	306628	321101	904337	837384	1.05246e+06	1.05246e+06	1.11195e+06	1.15331e+06	1.98774e+06	1.33484e+07	7.24243e+06	4.547e+07	4.547e+07	133652	344908	357696	913399	4949.18	10297.1	13741.4	5212.01	11569.2	16831.3	19478.8	11244.5	24878.9	23104.7	58412.8	38495.2	30482.9
5	Control	1000	27959.8	4159.82	21779.2	16719	35555.7	10476.8	33084.7	27811.9	28248.4	61870.5	34718.3	98855.1	168428	151319	209255	355872	374230	368984	326326	983455	976699	1.4059e+06	1.4059e+06	1.27611e+06	1.34573e+06	2.03435e+06	1.29026e+07	9.72444e+06	2.44208e+07	2.44208e+07	191295	888056	375108	2.34529e+06	4625.97	5293.2	12626.2	6991.47	9297.28	24761.6	20810.1	9503.7	42330	28032.2	31794.4	29281.6	34924.9
6	Control	6188.72	3522.49	79226.8	11649.5	25316.4	43591.4	41261.4	33742.7	24485.7	57264.3	69991.9	43925.8	134710	106824	165385	130030	276596	351684	314674	356998	896761	1.31599e+06	1.56101e+06	1.56101e+06	1.76756e+06	1.79838e+06	2.39404e+06	1.28246e+07	1.63951e+07	4.60043e+07	4.60043e+07	194872	142093	365104	1.05642e+06	4178.15	4659.83	12385	12940.2	21389.3	17265.7	22633.6	16625.8	12007.8	17320.9	32618.7	27376.2	35954.8
7	Control	7964.67	20877.9	23349.2	23571	26530.2	28022.6	43281.1	33048.2	50425	42368.1	115111	110071	84217.2	155134	423806	372935	280411	272194	319430	349949	2.49603e+06	1.45258e+06	2.3161e+06	2.3161e+06	1.93891e+06	1.94665e+06	2.75411e+06	1.50425e+07	1.64733e+07	4.43989e+07	4.43989e+07	183196	515737	376136	855006	5566.76	11412.4	14496.9	16193.9	30718.2	23153.1	25882.3	33040.1	41744.6	21105.8	39391.7	82009.1	48699.3
8	Control	1000	17095.7	8312.47	17796.8	20239	31192.2	60242.1	31190	34386	47002.6	39286.1	45985.9	131713	123820	119041	125575	345527	393528	411008	431315	1.01724e+06	2.31859e+06	2.09e+06	2.09e+06	3.00961e+06	2.96752e+06	3.85885e+06	1.78018e+07	1.94719e+07	4.44826e+07	4.44826e+07	285498	183823	369451	1.3159e+06	4603.16	7432.3	18101.5	20178.8	14244	20156.5	34481.1	27323.2	34410.5	31093.4	54191.4	18394	52598.2
9	Control	9210.61	5772.41	26130.6	20967	17783.6	37208.6	42940.5	18831.7	28356.1	43339.4	52455.1	270012	155990	167036	198988	258531	225398	313449	319677	380669	1.48914e+06	1.44453e+06	2.15246e+06	2.15246e+06	1.85835e+06	1.94442e+06	2.91571e+06	1.52811e+07	1.46494e+07	5.4986e+07	5.4986e+07	321638	327196	382160	1.35682e+06	4775.12	3927.52	23425.6	17383.3	19475.9	12021.4	18574.9	24677	18614.9	34733.7	35544.9	39575.7	52022.5
10	Control	2725.23	24027.7	7960.4	17852.8	25148	31452.1	164467	27087.8	46345.8	57857.9	118533	462252	458971	236157	262260	556325	326881	298346	496082	635287	1.03259e+06	5.33072e+06	2.66223e+06	2.66223e+06	7.26606e+06	6.88709e+06	7.31583e+06	2.35353e+07	4.6702e+07	7.70306e+07	7.70306e+07	68543.4	383800	389685	714938	3667.61	11098	24860.4	21645.1	19690.9	20662.5	20656.3	35767.4	39382.7	31432	31049.9	112824	84949.2
11	Control	1576.86	19844.3	14397.8	23843.2	47673.8	32971.2	19995.9	94088.8	53519.6	36471.3	64521.8	57133.7	51738.4	180904	176140	375555	285254	377272	353810	418813	1.49499e+06	2.20207e+06	1.72877e+06	1.72877e+06	2.93396e+06	2.92551e+06	3.49288e+06	1.68001e+07	2.23555e+07	4.0342e+07	4.0342e+07	132215	244937	381098	832427	5452.17	7197.5	18653.6	14536.5	27673	19793.3	36585	22456.1	35896.8	28262.2	65782.3	75718.5	50049.8
12	Control	6802.24	21649.3	16429.7	30129.8	40729.4	41099.7	20251.6	88676.6	80473.8	53952.8	78182.1	105655	383828	162451	311881	142027	448932	298874	589708	337321	1.01059e+06	1.61634e+06	2.08964e+06	2.08964e+06	2.10205e+06	2.13865e+06	2.95845e+06	2.1451e+07	1.42928e+07	4.12351e+07	4.12351e+07	284693	711079	371107	3.47931e+06	7227.68	4345.56	32026.3	15047.9	10639.9	34002.5	38687.5	26600.6	33365	26312.7	29370.5	82166.1	53198.3
13	Control	34764.2	6070.21	62679.5	19072.1	4263.81	44622.7	37181.4	4132.57	55767.6	41349.6	138894	105569	188805	498568	516587	204664	283513	386739	349538	382979	2.091e+06	1.7975e+06	1.99005e+06	1.99005e+06	2.33171e+06	2.3951e+06	3.08816e+06	1.37127e+07	1.57961e+07	5.13405e+07	5.13405e+07	373050	221038	383412	1.2177e+06	7904.96	6697.08	15480.1	17101.2	14842.6	22934.8	25924.6	46147.8	21860.1	27583.2	6362.01	69324.4	46494.4
14	Control	4272.54	9505.91	19224	15950.6	15772.3	23367.6	32571.6	12663.1	43836.3	51931	57443.8	218929	109566	109671	249928	109735	262254	356839	305531	335799	440101	1.64136e+06	1.87523e+06	1.87523e+06	2.19225e+06	2.13495e+06	3.36362e+06	1.43837e+07	1.68092e+07	4.8381e+07	4.8381e+07	115322	245644	385188	876381	5600.26	9600.17	21989.3	17045.1	25765.5	22160.3	39870.1	26002.6	28234.4	23157.1	18695.9	37795	40814.7
15	Control	1000	6973.62	2838.64	21261.8	35737.1	42934.2	19156.5	53802	39590.7	38349.7	55136.9	129279	154564	117756	457163	392767	258100	170446	351616	287791	1.49333e+06	1.18616e+06	1.69749e+06	1.69749e+06	1.55352e+06	1.59125e+06	3.10985e+06	1.9895e+07	1.24571e+07	6.32606e+07	6.32606e+07	90621.8	445331	416271	1.67841e+06	8758.99	6496.62	35146.8	6928.5	14924.3	18271.7	22858.4	19440.7	25533.9	32745.7	34523.9	70383.8	41406
1	Patient	1000	11769.3	1000	6754.87	9913.67	5439.47	10244.5	11148.2	25153.9	16017.8	36768.8	41328.1	1000	61426.9	80551.3	117589	105283	247941	209376	310603	873668	1.21324e+06	1.32899e+06	1.32899e+06	1.70958e+06	1.65737e+06	2.62549e+06	1.17389e+07	1.59593e+07	2.64729e+07	2.64729e+07	419186	920244	448381	2.08101e+06	2584.08	5797.25	6577.94	18379.1	13900.8	15931.3	11717.5	14094.7	22634.6	35494.3	11443.3	30211.2	45357.2
2	Patient	1000	8089.77	1000	9295.37	6810.9	6336.49	18278.4	9279.16	20677.3	37765.7	60278.2	13778.2	8784.54	109541	76390.9	6983.12	194083	159137	213930	325889	37687.8	978214	1.5678e+06	1.5678e+06	1.41547e+06	1.35789e+06	2.1521e+06	1.14328e+07	9.08782e+06	3.46556e+07	3.46556e+07	378945	817011	447362	2.33157e+06	2937.21	4584.02	10182.2	10669.5	9771.52	23164.3	21645.6	9813.15	30361.4	29812.2	14445	31199.5	37167.6
3	Patient	1000	1587.25	1000	17115.8	8933.99	1000	5471.22	2149.01	2260.2	27321.1	73578.6	84230.8	1000	122418	164553	106025	127116	176380	78599.1	184309	1.06066e+06	37692.2	1.20927e+06	1.20927e+06	94749.2	177209	602409	8.62818e+06	1.66812e+06	3.68782e+07	3.68782e+07	1.38884e+06	600669	468104	3.69556e+06	5621.83	4982.53	12855.1	6787.11	16175	21390.2	13333	16553.4	13988.7	19562.1	6743.82	29342	52944.8
4	Patient	1000	1946.68	1000	14113.6	11478.3	11010.7	1090.12	6452.31	5887.08	29058.3	20013.7	17648.3	3393.58	76408.8	53075.5	14711.1	143202	178777	222938	197349	265112	46311.5	788115	788115	89882.1	152041	640708	1.07093e+07	1.30556e+06	2.37066e+07	2.37066e+07	208802	514162	419861	1.54711e+06	4132.49	3241.89	17340.9	5472.69	8546.45	21599	17315.5	7596.2	19924.9	27393.1	8213.93	16801.9	23334.3
5	Patient	1000	7423.6	1874.48	10882.5	2996.63	6099.28	2058.59	5750.73	5893.77	38527.2	55048.7	49311.6	37832.4	69556.6	85189.9	159859	133771	198539	252078	217747	484085	42058.1	1.04793e+06	1.04793e+06	80568.9	174251	886183	9.76153e+06	3.47555e+06	2.54638e+07	2.54638e+07	869139	350896	416353	1.32532e+06	2367.83	4801.1	7296.73	7613.67	22108.3	14066.7	12641.8	24327.7	8050.56	9821.55	15849.2	18486.1	17475.3
6	Patient	1000	7228.56	1000	13198	6087.87	8578.97	14835.8	3504.75	23986.9	29372.5	41912.9	17531.4	28539.3	91957.2	66662.2	21039.3	223962	118783	256039	294178	291613	954953	1.44686e+06	1.44686e+06	1.36462e+06	1.318e+06	1.98874e+06	1.06206e+07	1.5726e+07	3.2646e+07	3.2646e+07	263401	1.40025e+06	436447	2.22765e+06	3219.64	3481.45	7206.59	11799.3	11517.1	18237.6	24444	7545.49	25755.9	17041.1	9191.77	34172.4	31392.4
7	Patient	1000	3022.47	1000	7968.4	5689.4	37998.8	20413.2	3204.25	9900.8	31430.1	43282.9	111236	47027.8	71372.5	141687	141398	184185	185676	194546	297253	921830	764857	1.64088e+06	1.64088e+06	1.10794e+06	1.0785e+06	1.86515e+06	9.47588e+06	1.23557e+07	3.50816e+07	3.50816e+07	513083	805189	395336	3.72651e+06	3333.91	1773.52	11876.1	13311.6	127576	12226.5	15759	20789.2	26563.9	21107.9	8569.14	38104.5	47666.7
8	Patient	1000	1408.55	1000	17303.4	15481.3	24241.2	26102.5	27473	25325.7	33815.8	35060.2	30989.3	4832.36	110709	113231	115718	164975	169797	209477	314539	872565	891619	1.27113e+06	1.27113e+06	1.24668e+06	1.23818e+06	2.17793e+06	8.8737e+06	1.0499e+07	3.78765e+07	3.78765e+07	600088	1.33682e+06	370998	2.38129e+06	4691.45	4833.48	9334.71	12935.2	19639.3	10678.5	21956.1	12185.9	18195.7	23813.4	47997.1	82753.1	28164.8
9	Patient	9815.79	6895.21	27280.8	13271.6	22490.5	32277	20642.4	24086.3	40239.5	27191.8	80514.5	57543.5	101417	129516	107505	369408	230404	263877	300405	334771	1.2621e+06	798430	1.40605e+06	1.40605e+06	1.04328e+06	1.14735e+06	1.69603e+06	1.23924e+07	8.44219e+06	3.61505e+07	3.61505e+07	170120	127317	386247	726161	4530.72	4903.03	10557.9	17236.7	13324.4	14844.8	17046	19883	18555.3	13007.1	30611.1	70415.4	32404.5
10	Patient	1000	23182.1	1000	18163	8740.7	27589	43827	30510.6	37245	45910.9	41169.3	40497.3	38570	117962	120053	68628.2	327615	383500	360012	344935	326997	1.16631e+06	1.88571e+06	1.88571e+06	1.61108e+06	1.57687e+06	2.54938e+06	1.75915e+07	1.12305e+07	6.12568e+07	6.12568e+07	414948	773169	400535	2.74649e+06	4264.67	1541.03	22467.3	10301	19462.6	23744.3	27490.4	18446.9	30810.2	24938.2	39014.8	18226.8	36398.4
11	Patient	1000	1000	13147.1	21656.6	81581.8	22048.2	21717.9	206047	14901.5	38075.2	36553.5	160048	6813.65	120567	133676	94089.7	233692	222987	256384	422583	614907	1.41783e+06	1.24272e+06	1.24272e+06	1.97624e+06	1.96732e+06	2.58638e+06	1.14267e+07	1.35634e+07	3.55889e+07	3.55889e+07	474884	576673	386489	2.27797e+06	4498.52	2233.32	11868.2	12738.1	12796.6	11885.4	23421.3	15147.1	13023.2	16901	17154.2	41570.7	34948.8
12	Patient	1087.94	6678.9	38292.9	14865.9	1720.07	34405.7	35009.8	1000	13798.8	21968.3	32181.2	44178.7	201773	44922.2	147729	121479	286132	351257	291872	358588	724267	1.17076e+06	1.33474e+06	1.33474e+06	1.65628e+06	1.5775e+06	2.97382e+06	1.23898e+07	1.06029e+07	4.37936e+07	4.37936e+07	253669	404798	385514	1.08658e+06	4741.67	2383.18	26097.6	9797.86	10784.9	20459.5	27435.9	10420.7	7048.54	27398.8	7125.8	34433.5	29665.2
13	Patient	1000	2561.55	1000	8341.08	2007.96	24297.6	13258.5	1000	12950.8	33876	18945.5	23610.6	1000	14922.4	97860.8	87550.5	225218	155109	239973	276234	373192	643984	1.13538e+06	1.13538e+06	870463	917049	1.87838e+06	1.12989e+07	6.43741e+06	3.54918e+07	3.54918e+07	1.99433e+06	1.85717e+06	386327	9.01651e+06	3350.36	6965.26	15148.3	8470.35	9247.19	17708.6	26456.9	9228.32	17158.1	16511.4	1549.48	8503.23	40807.3
14	Patient	1000	13132.3	1000	12839	10533	23097.7	18775.2	20977.1	23625.4	56006.4	30315.9	47129.9	19529.3	126086	201772	21913.4	283800	301420	279049	310121	86921.2	940711	1.50155e+06	1.50155e+06	1.26554e+06	1.31279e+06	2.40083e+06	1.15457e+07	8.54902e+06	3.40448e+07	3.40448e+07	265204	908178	365818	1.92357e+06	5195.12	7376.25	12506.6	8367.16	7651.2	17997.4	33541.8	11258.2	9162.09	19467.5	38996	8370.15	45783
15	Patient	8693.79	1482.06	21361.9	14209.6	20515.1	24621.1	35079.4	25889.6	52266.5	37921.1	80267.8	82828.1	143277	109150	227951	297097	235531	224801	267442	368546	903314	1.66701e+06	2.01963e+06	2.01963e+06	2.20684e+06	2.19444e+06	3.13881e+06	1.49881e+07	1.47502e+07	4.72659e+07	4.72659e+07	442369	395813	394240	2.64831e+06	11014.8	3164.65	19189.6	12553	11683.6	16057.1	31443.9	21098	15274.5	31249.9	29683.3	34274.4	43592.3
16	Patient	1000	18946.3	1000	27346.6	7233.9	34646.7	1000	41341.6	26186.3	38252.2	64057.9	29804	59047.8	152872	84816.1	38130.8	220771	162087	419407	290781	249988	1.18984e+06	1.73265e+06	1.73265e+06	1.5977e+06	1.41736e+06	1.85036e+06	24862652	1.24043e+07	2.06175e+07	2.06175e+07	75619.4	624317	414963	1.40395e+06	3459.23	11659.9	23452.7	206755	17388.1	15321.9	20993.7	116076	50704.7	5141.88	78800.7	84061.4	78127.6
17	Patient	1000	14655.2	1000	18991.5	24058.6	25207.8	3008.74	12724	22418.7	39565.3	61376.8	53487.3	106565	139433	195111	105780	265659	205258	365562	236809	546352	513006	1.37222e+06	1.37222e+06	663302	746210	1.6022e+06	1.36751e+07	1.05404e+07	3.34019e+07	3.34019e+07	218683	491973	396393	1.9202e+06	2541.02	8220.32	17288.6	10663.6	12721.8	18718.5	20805.1	17969.3	21453.1	13460.8	12387.2	28630.6	32187.9
[truncated: 313 more columns]
